# Supplementary material
Source: publisher site journal article supplement (https://static.cambridge.org/content/id/urn:cambridge.org:id:article:S1041610218001679/resource/name/S1041610218001679supp002.docx)
Supplement: Supplementary file 1 [file S1041610218001679supp002.docx]

The supplementary file (excel, 37KB) summarizes the details of the 64 trials in 11 spreadsheets. The 12th spreasheet contains explanations for the acronyms used in the previous 11 spreadsheets. Each spreadsheet corresponds to each subheading in the Results section in the same order. The trials in spreadsheets are organized reverse-chronologically.
